# Supplementary material for: Isoform-Specific Reduction of the Basic Helix-Loop-Helix Transcription Factor TCF4 Levels in Huntington’s Disease
Source: eNeuro. 2021 Oct 13;8(5):ENEURO.0197-21.2021. doi: 10.1523/ENEURO.0197-21.2021 (PMC8519306; doi:10.1523/ENEURO.0197-21.2021)
Supplement: Extended Data Figure 1-1 — List of antibodies used in immunocytochemical screen in Hdh cell line cells. *Catalogue numbers starting with sc refer to antibodies from Santa Cruz, all other antibodies are from CeMines. Download Figure 1-1, XLS file. [file enu-eN-NWR-0197-21-s02.xls]

## Sheet: Sheet1
	specificity	catalogue number*
bHLH factors	AP-4	HLH250
	ASCL3	HLH32
	ASH1	HLH31
	ATH1	HLH21
	ATH5	HLH22
	ATOH1	HLH320
	COE1	HLH111
	Dip1	HLH101
	Hes1	HLH51
	Hes1	HLH330
	Hes2	HLH52
	Hes4	HLH55
	Hes5	HLH54
	Hes6	HLH340
	ITF2/TCF4	HLH201
	MITF	HLH260
	Mop3	HLH200
	NeuroD1	HLH11
	NeuroD2	HLH12-2
	NeuroD3	HLH13
	NeuroD6	HLH310
	Neurogenin1	HLH1
	Neurogenin1	HLH290
	Neurogenin2	HLH2
	Neurogenin3	HLH3
	Neurogenin3	HLH300
	NSCL1	HLH41-2
	NSCL2	HLH42
	Olig1	HLH91
	Olig1	HLH380
	Olig3	HLH93
	Olig3	HLH390
	Sharp1	HLH61
	Sharp1	HLH350
	Sharp2	HLH62
	Sharp2	HLH360
	Sim1	HLH210
	Sim2	HLH220
	TFE3	HLH270
	TFEB	HLH280
	USF1	HLH230
	USF2	HLH240
Homeodomain factors	BarH	HD2
	BarH2	HD1
	Barx1	HD3
	Cdx1	HD131
	Cdx2	HD141
	Dlx1	HD21
	Dlx2	HD22
	Dlx2	HD290
	Dlx5	HD23
	Emx2	HD270
	Emx2	HD31-2
	Hex	HD161
	HoxB7	HD171
	Irx2	HD200
	Irx2a	HD61
	Irx3	HD210
	Irx4	HD220
	Irx5	HD230
	Irx5/2a	HD250
	Irx6	HD240
	Lbx2	HD101
	Msx1	HD181
	Msx2	HD191
	Nkx2.9	HD72
	Nkx5.2	HD74
	Pdx1	HD280
	Pdx1	HD91
	Ptx2	HD151
	Ptx3	HD11
	Ptx3	HD260
	ISL1	LIM1
	LHX2	LIM2
	LHX4	LIM4
	LHX5	LIM5
	LMO4	LIM6
	Pax4	PBX1
	Pax6	PBX11
	Brn5	POU1
	Brn3a	POU11
	Brn4	POU21
	Oct4	POU31
	Six1	SIX1
	Six2	SIX2
	Six3	SIX3
	Six4	SIX4
	Six5	SIX5
	Six6	SIX6
Forkhead factors	FoxA1	FOX1
	FoxA2	FOX10
	FoxA3	FOX90
	FoxB1	FOX100
	FoxC1	FOX110
	FoxC2	FOX20
	FoxD1	FOX30
	FoxD2	FOX120
	FoxD3	FOX40
	FoxD4L1	FOX130
	FoxD4L2	FOX140
	FoxE1	FOX150
	FoxE2	FOX160
	FoxE3	FOX170
	FoxF1	FOX50
	FoxF2	FOX180
	FoxG1B	FOX190
	FoxH1	FOX200
	FoxI1pan	FOX220
	FoxI1 v1	FOX210
	FoxJ1	FOX230
	FoxK2 v1	FOX240
	FoxK2 v2	FOX250
	FoxK2 v3	FOX260
	FoxL1	FOX270
	FoxM1	FOX60
	Foxm1A/B/C	FOX280
	FoxN2	FOX290
	FoxN3	FOX300
	FoxO1	FOX70
	FoxO3A	FOX310
	FoxO4	FOX320
	FoxP1	FOX330
	FoxP2	FOX340
	FoxP4	FOX350
	FoxQ1	FOX80
Zinc finger factors	GATA4	ZF141
	GATA5	ZF151
	Gli1	sc-20687
	Gli2	sc-28674
	Gli3	sc20688
	KLF2	ZF161
	KLF4	ZF171
	KLF5	ZF181
	KOX1	ZF121
	Mtsh1	ZF101
	Neu2	ZF31
	Nurr1	ZF1
	Nurr1	ZF200
	SALL2	ZF12
	SALL3	ZF13
	Scratch	ZF41
	SSA1	ZF91
	ZFP15	ZF81
	ZFP200	ZF131
	ZFP38	ZF51
	Zhx1	ZF71
	Zic1	ZF21
	Zic2	ZF23
	Znf-HX	ZF111
HMG proteins	HMG17	HMG50
	Sox1	HMG1
	Sox1	HMG60
	Sox2	HMG2
	Sox3	HMG3
	Sox10	HMG4
	Sox10	HMG70
	Sox18	HMG14
	Sox22	HMG13
	Sox22	HMG80
Chromatin modeling proteins	HDAC1	sc-7872
	HDAC2	sc-7899
	HDAC3	sc-11417
	HDAC4	sc-11418
	HDAC5	sc-11419
	HDAC5	CMP21
	HDAC6	sc-11420
	HDAC7	sc-11421
	HDAC8	sc-11405
	MOZ	CMP11
	RB46	CMP1
Splicing associated factors	C1QBP	RNB71
	Nova1	RNB21
	Nova2	RNB22
	TRIP	RNB41
	Def-3	RNB51
	PUF60	RNB61
	SF1	SF20
	SF4	SF30
	SFRS1/9	SF40
	SFRS2	SF50
	SFRS3	SF60
	SFRS4	SF70
	SFRS5	SF80
	SFRS6	SF90
	SFRS10	SF100
	SFRS12	SF110
	SFRS14	SF120
	SR-A1	SF10
	SrRm160	SF130
Others	TFII-I	GTF1
	TAFII-55	GTF11
	RPA 70	REC181
	MTG8	RNT1
	RUNX1	RNT10
	RUNX2	RNT20
	Tbx2	TBX2
	TIP21	VAR20
	KIAA0854	VAR31
	KIAA0708	VAR41
	BRAP2	VAR51
	TLE1	VAR60
	TLE2	VAR70
	TLE3	VAR80
	BF2	WH1
